# Supplementary material for: Removal of psychopharmaceuticals from WWTP effluent by an algae–mussel trophic cascade: a potential nature-based solution?
Source: Environ Sci (Camb). 2025 May 9;11(7):1643–56. doi: 10.1039/d5ew00011d (PMC12096836; doi:10.1039/d5ew00011d)
Supplement: EW-011-D5EW00011D-s001 [file EW-011-D5EW00011D-s001.xlsx]

## Sheet: S1 - Target Compounds
Table S1: List of Target psychopharmaceuticals, formulae, CAS, ATC number, pharmaceutical class, corresponding labelled internal standard formula.
Compound	Formula	CAS	ATC Number	Class	Labelled Standard Formula	Note
Acetaminophen/Paracetamol	C8H9NO2	103-90-2	N02BE01	Analgesic	C8D4H5NO2
Amitriptyline	C20H23N	50-48-6	N06CA01	Psychoanaleptics	C20D3H20N
Amphetamine	C9H13N	300-62-9	N06BA01	Stimulants	C13D10H7NO2	Semi-Quantified - Labelled is Ritalinic Acid
Aripiprazole	C23H27Cl2N3O2	129722-12-9	N05AX12	Psycholeptic	C23D8H19Cl2N3O2
Bupropion	C13H19BrClNO	34911-55-2	N06AX12	Psychoanaleptics	C13D6H12ClNO2	Semi-Quantified - Labelled is Hydroxyuproprion
Caffeine	C8H10N4O2	58-08-2	N06BC01	Stimulants	C5^13C3H10N4O2
Carbamazepine	C15H12N2O	298-46-4	N03AF01	Antiepileptic	C15D10H2N2O
Chlorpromazine	C17H19ClN2S	50-53-3	N05AA01	Psycholeptic	C17D3H16ClN2S
Citalopram	C20H21FN2O	59729-33-8	N06AB04	Psychoanaleptics	C20D6H15FN2O
Clonidine	C9H9Cl2N3	4205-90-7	N02CX02	Analgesic	C9D4H5Cl2N3
Clozapine	C18H19ClN4	5786-21-0	N05AH02	Psycholeptic	C18D4H15ClN4
Duloxetine	C18H19NOS	116539-59-4	N06AX21	Psychoanaleptics	C18D3H16NOS
Fluoxetine	C17H18F3NO	54910-89-3	N06CA03	Psychoanaleptics	C17D6H12F3NO
Fluvoxamine	C15H21F3N2O2	54739-18-3	N06AB08	Psychoanaleptics	C15D3H18F3N2O2
Gabapentin	C9H17NO2	60142-96-3	N03AX12	Antiepileptic	C9D10H7NO2
Haloperidol	C21H23ClFNO2	52-86-8	N05AD01	Psycholeptic	C21D4H19ClFNO2
Lamotrigine	C9H7Cl2N5	84057-84-1	N03AX09	Antiepileptic	C8^13CH7Cl2N^15N4
Levetiracetam	C8H14N2O2	102767-28-2	N03AX14	Antiepileptic	C8D6H8N2O2
Lidocaine	C14H22N2O	137-58-6	N01BB52	Anaesthetic	C14D10H12N2O
Mianserin	C18H20N2	24219-97-4	N06AX03	Psychoanaleptics	C18D3H17N2
Paroxetine	C19H20FNO3	61869-08-7	N06AB05	Psychoanaleptics	C19D6H14FNO3
Phenacetin	C10H13NO2	62-44-2	N02BE73	Analgesic	-	Semi-Quantified - Using Paracetamol IS
Pregabalin	C8H17NO2	148553-50-8	N03AX16	Antiepileptic	C8D6H11NO2
Quetiapine	C21H25N3O2S	111974-69-7	N05AH04	Psycholeptic	C21D8H17N3O2S
Sertraline	C17H17Cl2N	79617-96-2	N06AB06	Psychoanaleptics	C17D3H14Cl2N
Topiramate	C12H21NO8S	97240-79-4	N03AX11	Antiepileptic	C12D12H9NO8S
Tramadol	C16H25NO2	27203-92-5	N02AX02	Analgesic	C15^13CD3H22NO2
Venlafaxine	C17H27NO2	93413-69-5	N06AX16	Psychoanaleptics	C17D6H21NO2
Ibuprofen	C13H18O2	15687-27-1	N02AJ19	Analgesic	C13D3H15O2
Phenytoin	C15H12N2O2	57-41-0	N03AB52	Antiepileptic	C15D10H2N2O2

## Sheet: S2 - PNECs
Table S2: PNEC values taken from the NORMAN Database for the 30 compounds used for the risk assesment, along with the assessment factor (used by NORMAN), source type (Modelled or Literature), and species
Compound	PNEC (ng/l)	Assesment Factor	Source	Species
(Es)citalopram	0.000268	10	Literature	Danio rerio
Acetaminophen/Paracetamol	0.046	10	Literature	Not Stated
Amitriptyline	0.00014	1000	Predicted	Algae
Amphetamine (SQ)	0.0582	1000	Predicted	Daphnia
Aripiprazole	0.00026	10	Literature	Daphnia
Bupropion (SQ)	0.00111	10	Literature	Algae
Caffeine	0.0012	100	Literature	Daphnia magna
Carbamazepine	0.002	50	Literature	Daphnia pulex
Chlorpromazine	6.6e-05	1000	Predicted	Algae
Clonidine	0.00207	1000	Predicted	Algae
Clozapine	0.00018	100	Literature	Pimephales promelas
Duloxetine	0.00043	10	Literature	Algae
Fluoxetine	0.0001	10	Literature	Danio rerio
Fluvoxamine	0.00249	1000	Predicted	Algae
Gabapentin	1	100	Literature	Not Stated
Haloperidol	0.0037	100	Literature	Algae
Ibuprofen	1.1e-05	-	Literature	Not Stated
Lamotrigine	0.008	50	Literature	Not Stated
Levetiracetam	0.038	1000	Predicted	Algae
Lidocaine	0.6	100	Literature	Algae
Mianserin	0.00032	1000	Predicted	Algae
Paroxetine	0.02	100	Literature	Ceriodaphnia dubia
Phenacetin (SQ)	9.83	1000	Predicted	Daphnia
Phenytoin	0.00087	1000	Predicted	Algae
Pregabalin	0.1	10	Literature	Fish
Quetiapine	0.01	10	Literature	Fish
Sertraline	9.4e-06	50	Literature	Not Stated
Topiramate	0.93	100	Literature	Algae
Tramadol	0.00865	1000	Predicted	Algae
Venlafaxine	0.00088	-	Literature	Not Stated

## Sheet: S3 - Concentrations
Table S3: Concentrations in the samples for each of the 27 qualifiable compounds displayed as ng/L). 'Pre-' indicates the samples corrisponding to the starting aquaria.
Compound	Pre-ALG	ALG	Pre-CON	CON	ama	amb	amc	amd	ame	amf	amg	amh	aca	acb	acc	acd	ace	acf	acg	ach	ema	emb	emc	emd	eme	emf	emg	emh	eca	ecb	ecc	ecd	ece	ecf	ecg	ech	Pre-blank	am-blank	ac-blank	em-blank	ec-blank
Acetaminophen/Paracetamol																																				-
Amitriptyline	56.96		113.785																																	-
Amphetamine																																				-
Ariprazole																																				-
Bupropion																																				-
Carbamazepine	409.217	549.892	352.885	292.03	900.095	851.96	888.43	332.765	674.475	694.855	591.58	755.28	853.115	573.925	544.925	275.19	579.5	494.185	603.035	636.18	413.33	587.6	444.725	409.58	449.905	456.7	550.58	412.93	331.305	323.655	213.95	280.815	372.83	286.235	440.485	-
Chlorpromazine																																				-
Citalopram	196.345	4.995	130.143	91.9	3.35	5.035	2.66	2.715	4.36	2	3.405	3.215	22.035	16.255	17.075	4.9	8.69	14.975	20.475	21.045	42.445	47.055	34.875	40.895	31.53	44.885	41.82	31.43	66.045	71.655	78.38	90.21	84.21	42.71	91.595	-	8.005
Clonidine																																				-
Duloxetine																																				-
Fluoxetine																																				-
Fluvoxamine	51.6175	55.6875	38.46	61.01	92.48	90	106.68	62.385	87.64	85.595	73.85	85.93		73.55	79.1		65.695		63.69	60.485	69.54	87.54	90.96	81.87	79.265	77.115	94.105	88.31	68.18	72.61	61.195	64.895	68.915	66.005	85.66	-
Gabapentin	720.405	407.79	731.782	196.502	1514.97	1532.35	1636.85	791.415	1435.37	1209.98	1187.34	1404.31	1910.56	1676.02	1423.68	634.99	1311.65	1501.59	1851.92	1559.37	705.83	824.155	708.755	698.8	997.665	790.475	924.64	694.13	196.645	196.805	229.275	147.415	218.2	209.67		-
Haloperidol																																				-
Lamotrigine	412.885	776.293	341.203	348.788	241.045	199.635	291.445	143.705	248.545	192.345	240.525	257.655	113.92	73.415	78.005	59.385	100.01	88.335	94.64	98.75	493.145	625.025	513.475	457.475	528.49	542.11	565.285	437.525	424.95	417.71	295.89	333.575	401.27	331.76	516.575	-
Levetiracetam																																				-
Lidocaine	115.37	104.345	103.94	89.7625	97.015	88.805	98.935	63.03	94.35	82.07	81.685	90.565	108.305	86.25	91.725	71.68	93.705	91.455	97.96	89.435	86.705	108.775	89.69	90.35	88.385	95.58	99.885	90.365	101.08	87.525	72.015	84	90.745	79.435	100	-
Mianserin																																				-
Paroxetine																																				-
Pregabalin	48.425	49.425	56.5225	14.02	159.665	174.545	192.4	75.45	163.795	118.885	115.6	145.955	220.265	161.665	159.5	65.845	135.62	138.155	209.64	199.57	80.76	83.145	92.39	60.15	85.065	92.135	79.625	60.93	25.085	23.065	34.215	15.9	27.04	17.935	81.805	-
Quetiapine	101.97	20.15	17.2725	9.685	4.065	3.94	5.085		3.74	4.62	5.285		5.245	7.415		5.65	5.945	6.715	7.68	6.805	5.98	6.175	4.52		5.275	3.6	6.62	4.065	4.19	4.89	4.415	4.74	7.37	5.395	3.685	-
Sertraline																																				-
Topiramate																																				-
Tramadol	565.817	292.295	392.97	294.282	283.475	234.39	290.695	123.225	279.52	211.12	213.595	238.335	341.065	260.105	275.81	159.455	243.245	264.245	305	273.795	281.48	390.195	307.885	305.655	319.635	324.865	367.045	326.2	354.845	299.095	208.485	276.07	317.465	250.83	396.445	-	2.02	2.13	2.98	1.94	2.09
Venlafaxine	283.918	98.2125	179.472	153.593	113.32	99.135	115.59		104.085	80.445	81.94	100.255		90.465	106.595	77.685	97.295	109.3	117.145	113.97	131.985	162.835	137.805	154.255	135.005	154.255	154.595	133.83	159.975	134.645	102.035	131.11	149.645	124.635	186.075	-
Ibuprofen	1431.25	1271.49	1616.2	1674.39	2512.34	2642.01	2360.03	1279.03	2200.53	2014.03	1906.22	2214.98	1719.91	2217.56	3213.44	2601.44	2676.55	1478.09	2410.01	2147.82	2473.85	2465.5	1500.19	2274.17	1730.03	1584.15	1997.6	1795.38	2129.34	1672.05	2342.26	2289.69	2557.6	2258.64	2486.43	-	23.42	21.775	19.195	16.92
Phenytoin																																				-

## Sheet: S4 - Removals
Table S4: Removals for each of the 3 treatments for the 11 compounds with reported removals. Means and standard deviations are found on the far right of the table.
Compound	ama	amb	amc	amd	ame	amf	amg	aca	acb	acc	acd	ace	acf	acg	ema	emb	emc	emd	eme	emf	emg	AM Mean	AM SD	AC Mean	AC SD	EM Mean	EM SD
Carbamazepine	2.71682	2.63231	4.15251	1.185	1.80907	2.42757	1.34302	2.57501	1.77326	2.54697	0.979969	1.55433	1.7265	1.36903	1.24758	1.81551	2.07864	1.45854	1.20673	1.59554	1.24994	-1.32376	± 0.4	-0.789296	± 0.3	-0.521784	± 0.2
Citalopram	0.050723	0.0702673	0.0339372	0.0300964	0.0517753	0.0468274	0.0371745	0.333636	0.226851	0.217849	0.0543177	0.103194	0.35062	0.223538	0.642668	0.656688	0.444948	0.453331	0.374421	1.05092	0.456575	0.954171	± 0.28	0.784285	± 0.47	0.417206	± 0.37
Fluvoxamine	1.35641	1.2395	1.74328	0.961322	1.27171	1.2968	0.862129		1.01295	1.29259		0.953276		0.743521	1.01995	1.20562	1.4864	1.26158	1.15019	1.16832	1.09859	-0.247307	± 0.21	-0.000582953	± 0.2	-0.198662	± 0.11
Gabapentin	7.70411	7.78613	7.13922	5.36862	6.57823	5.77088		9.71578	8.51612	6.20951	4.3075	6.01123	7.16166		3.58936	4.18767	3.09129	4.74036	4.57225	3.77009		-5.72453	± 0.14	-5.98697	± 0.25	-2.99184	± 0.14
Lamotrigine	0.567231	0.477927	0.984978	0.430803	0.619396	0.579772	0.465615	0.268079	0.175756	0.263628	0.178026	0.249234	0.266262	0.183207	1.16048	1.49631	1.73536	1.37143	1.31704	1.63404	1.09429	0.410611	± 0.29	0.773687	± 0.18	-0.40128	± 0.16
Lidocaine	0.959784	1.01462	1.37381	0.750357	1.03973	1.03317	0.81685	1.07148	0.985433	1.27369	0.853333	1.03262	1.15132	0.9796	0.857786	1.24279	1.24543	1.0756	0.973993	1.20325	0.99885	0.00166781	± 0.19	-0.0496392	± 0.12	-0.085385	± 0.13
Pregabalin	6.36496	7.56753	5.62326	4.74528	6.05751	6.62866	1.41312	8.78075	7.0091	4.6617	4.14119	5.01553	7.70309	2.56268	3.21945	3.60481	2.70028	3.78302	3.14589	5.13716	0.973351	-4.48576	± 0.34	-4.69629	± 0.36	-2.22342	± 0.36
Quetiapine	0.970167	0.805726	1.15176		0.507463	0.856348	1.43419	1.25179	1.51636		1.19198	0.806649	1.24467	2.08412	1.42721	1.26278	1.02378		0.715739	0.667285	1.79647	0.0457246	± 0.3	-0.349263	± 0.29	-0.148878	± 0.35
Tramadol	0.79887	0.783664	1.39432	0.446354	0.880475	0.841686	0.538776	0.961166	0.86964	1.32292	0.577589	0.76621	1.05348	0.769337	0.793248	1.30459	1.47677	1.10716	1.00684	1.29516	0.925841	0.187979	± 0.35	0.0970928	± 0.25	-0.129944	± 0.2
Venlafaxine	0.708361	0.736269	1.13285		0.695546	0.645445	0.44036		0.671878	1.04469	0.592518	0.650172	0.876961	0.629558	0.825035	1.20937	1.35057	1.17653	0.902168	1.23765	0.830821	0.273529	± 0.28	0.255704	± 0.22	-0.0760201	± 0.19
Ibuprofen	1.17987	1.5801	1.00759	0.558605	0.860391	0.8917	0.766649	0.807722	1.32625	1.37194	1.13615	1.04651	0.654416	0.969267	1.16179	1.47453	0.64049	0.99322	0.676427	0.701373	0.803399	0.0221571	± 0.31	-0.0446082	± 0.23	0.0783952	± 0.31

## Sheet: S5 - Risks
Table S5: Risk quotients for each of the treatments for the 12 compounds with reported concentrations. Means are found on the far right of the table.
Compound	Pre-ALG	ALG	Pre-CON	CON	ama	amb	amc	amd	ame	amf	amg	amh	aca	acb	acc	acd	ace	acf	acg	ach	ema	emb	emc	emd	eme	emf	emg	emh	eca	ecb	ecc	ecd	ece	ecf	ecg	ech	AM	AC	EM	EC
Amitriptyline	0.406857		0.81275
Carbamazepine	0.204609	0.274946	0.176443	0.146015	0.450047	0.42598	0.444215	0.166382	0.337238	0.347428	0.29579	0.37764	0.426557	0.286962	0.272462	0.137595	0.28975	0.247093	0.301518	0.31809	0.206665	0.2938	0.222363	0.20479	0.224952	0.22835	0.27529	0.206465	0.165653	0.161828	0.106975	0.140407	0.186415	0.143118	0.220243	-	0.35559	0.285003	0.232834	0.160662
Citalopram	0.0732631	0.00186381	0.0485606	0.034291	0.00125	0.00187873	0.000992537	0.00101306	0.00162687	0.000746269	0.00127052	0.00119963	0.00822201	0.0060653	0.00637127	0.00182836	0.00324254	0.00558769	0.00763993	0.00785261	0.0158377	0.0175578	0.0130131	0.0152593	0.0117649	0.0167481	0.0156045	0.0117276	0.0246437	0.0267369	0.0292463	0.0336604	0.0314216	0.0159366	0.0341772	-	0.0012472	0.00585121	0.0146891	0.0279747
Fluvoxamine	0.0207299	0.0223645	0.0154458	0.024502	0.0371406	0.0361446	0.0428434	0.0250542	0.0351968	0.0343755	0.0296586	0.03451		0.0295382	0.0317671		0.0263835		0.0255783	0.0242912	0.0279277	0.0351566	0.0365301	0.0328795	0.0318333	0.0309699	0.0377932	0.0354659	0.0273815	0.0291606	0.0245763	0.0260622	0.0276767	0.026508	0.0344016	-	0.0343655	0.0275116	0.0335695	0.0279667
Gabapentin	0.000720405	0.00040779	0.000731782	0.000196502	0.00151498	0.00153235	0.00163685	0.000791415	0.00143537	0.00120998	0.00118734	0.00140431	0.00191056	0.00167602	0.00142368	0.00063499	0.00131165	0.00150158	0.00185192	0.00155937	0.00070583	0.000824155	0.000708755	0.0006988	0.000997665	0.000790475	0.00092464	0.00069413	0.000196645	0.000196805	0.000229275	0.000147415	0.0002182	0.00020967		-	0.00133907	0.00148372	0.000793056	0.000199668
Lamotrigine	0.0516106	0.0970366	0.0426503	0.0435984	0.0301306	0.0249544	0.0364306	0.0179631	0.0310681	0.0240431	0.0300656	0.0322069	0.01424	0.00917688	0.00975062	0.00742313	0.0125012	0.0110419	0.01183	0.0123438	0.0616431	0.0781281	0.0641844	0.0571844	0.0660613	0.0677637	0.0706606	0.0546906	0.0531187	0.0522138	0.0369862	0.0416969	0.0501587	0.04147	0.0645719	-	0.0283578	0.0110384	0.0650395	0.0486023
Lidocaine	0.000192283	0.000173908	0.000173233	0.000149604	0.000161692	0.000148008	0.000164892	0.00010505	0.00015725	0.000136783	0.000136142	0.000150942	0.000180508	0.00014375	0.000152875	0.000119467	0.000156175	0.000152425	0.000163267	0.000149058	0.000144508	0.000181292	0.000149483	0.000150583	0.000147308	0.0001593	0.000166475	0.000150608	0.000168467	0.000145875	0.000120025	0.00014	0.000151242	0.000132392	0.000166667	-	0.000145095	0.000152191	0.000156195	0.000146381
Pregabalin	0.00048425	0.00049425	0.000565225	0.0001402	0.00159665	0.00174545	0.001924	0.0007545	0.00163795	0.00118885	0.001156	0.00145955	0.00220265	0.00161665	0.001595	0.00065845	0.0013562	0.00138155	0.0020964	0.0019957	0.0008076	0.00083145	0.0009239	0.0006015	0.00085065	0.00092135	0.00079625	0.0006093	0.00025085	0.00023065	0.00034215	0.000159	0.0002704	0.00017935	0.00081805	-	0.00143287	0.00161283	0.00079275	0.000321493
Quetiapine	0.010197	0.002015	0.00172725	0.0009685	0.0004065	0.000394	0.0005085		0.000374	0.000462	0.0005285		0.0005245	0.0007415		0.000565	0.0005945	0.0006715	0.000768	0.0006805	0.000598	0.0006175	0.000452		0.0005275	0.00036	0.000662	0.0004065	0.000419	0.000489	0.0004415	0.000474	0.000737	0.0005395	0.0003685	-	0.000445583	0.000649357	0.000517643	0.0004955
Tramadol	0.0654124	0.0337913	0.0454301	0.0340211	0.0327717	0.0270971	0.0336064	0.0142457	0.0323145	0.0244069	0.0246931	0.0275532	0.0394295	0.0300699	0.0318855	0.0184341	0.0281208	0.0305486	0.0352601	0.0316526	0.032541	0.0451092	0.0355936	0.0353358	0.036952	0.0375566	0.0424329	0.037711	0.0410225	0.0345775	0.0241023	0.0319156	0.0367012	0.0289977	0.0458318	-	0.0270861	0.0306751	0.037904	0.0347355
Venlafaxine	0.0399321	0.0138133	0.0252423	0.0216023	0.0159381	0.013943	0.0162574		0.0146392	0.0113143	0.0115246	0.0141006		0.0127236	0.0149923	0.0109262	0.0136842	0.0153727	0.0164761	0.0160295	0.0185633	0.0229023	0.0193819	0.0216955	0.018988	0.0216955	0.0217433	0.0188228	0.0225	0.0189374	0.0143509	0.0184402	0.0210471	0.0175295	0.0261709	-	0.0139596	0.0143149	0.0204741	0.0198537
Ibuprofen	130.113	115.59	146.928	152.218	228.395	240.183	214.548	116.276	200.049	183.094	173.293	201.362	156.356	201.597	292.131	236.495	243.322	134.372	219.092	195.256	224.895	224.136	136.381	206.743	157.275	144.014	181.6	163.217	193.576	152.005	212.932	208.154	232.509	205.331	226.039	-	194.65	209.828	179.783	204.364

## Sheet: S6 - Statistics
Table S6: Kuskal-walis and Dunn's tests performed on all the quantifiable compounds in the study. Concentrations are on the left for each compound, followed by the first block performing the KW test, and the second block performing the Dunn's test. Formulae are found inside the cells with the exeption for the standard error in the Dunn's test, which requires a ties correction not nativly found in…
Amitriptyline	AM	AC	EM	EC	Start	Kruskal-Walis	AM	AC	EM	EC	Start				Dunn's	AM	AC	EM	EC	Start	Groups	diff. R-mean	std err	z-stat	R-crit	p-value	BH P value	Sig.
	0	0	0	0	56.96	Ranks	16	16	16	16	32	n	33		R-sum	128	128	128	112	65	AM:AC	0	25.3648	0	9.03617	1	0.025	NO
	0	0	0	0	113.785		16	16	16	16	33	Sum R^2/n	10048.5		n	8	8	8	7	2	AM:EM	0	2	0	0.712496	1	0.025	NO
	0	0	0	0	NA		16	16	16	16		H	5.47059		R-mean	16	16	16	16	32.5	AM:EC	0	2.0702	0	0.737503	1	0.025	NO
	0	0	0	0	NA		16	16	16	16		df	5		z-crit	2.80703					AC:EM	0	2	0	0.712496	1	0.025	NO
	0	0	0	0	NA		16	16	16	16		p	0.361182		n-total	33					AC:EC	0	2.0702	0	0.737503	1	0.025	NO
	0	0	0	0	NA		16	16	16	16		α	0.05		α*	0.005					EM:EC	0	2.0702	0	0.737503	1	0.025	NO
	0	0	0	0	NA		16	16	16	16		Sig.	NO								ST:AM	16.5	3.16228	5.21776	1.12655	1.81102e-07	0.005	YES
	0	0	0	NA	NA		16	16	16												ST:AC	16.5	3.16228	5.21776	1.12655	1.81102e-07	0.005	YES
						R-sum	128	128	128	112	65										ST:EM	16.5	3.16228	5.21776	1.12655	1.81102e-07	0.005	YES
						R^2/n	2048	2048	2048	1792	2112.5										ST:EC	16.5	3.20713	5.14478	1.14254	2.67836e-07	0.02	YES
Carbamazepine	AM	AC	EM	EC	Start	Kruskal-Walis	AM	AC	EM	EC	Start				Dunn's	AM	AC	EM	EC	Start	Groups	diff. R-mean	std err	z-stat	R-crit	p-value	BH P value	Sig.
	900.095	853.115	413.33	331.305	409.217	Ranks	33	31	13	6	10	n	33		R-sum	210	164	127	42	18	AM:AC	5.75	4.83477	1.1893	1.72238	0.234321	0.035	NO
	851.96	573.925	587.6	323.655	352.885		30	21	23	5	8	Sum R^2/n	11304.6		n	8	8	8	7	2	AM:EM	10.375	4.83477	2.14591	1.72238	0.0318798	0.02	NO
	888.43	544.925	444.725	213.95	NA		32	19	15	1		H	18.9051		R-mean	26.25	20.5	15.875	6	9	AM:EC	20.25	5.00446	4.04639	1.78283	5.20138e-05	0.005	YES
	332.765	275.19	409.58	280.815	NA		7	2	11	3		df	5		z-crit	2.80703					AC:EM	4.625	4.83477	0.956612	1.72238	0.338763	0.04	NO
	674.475	579.5	449.905	372.83	NA		27	22	16	9		p	0.00200197		n-total	33					AC:EC	14.5	5.00446	2.89741	1.78283	0.00376253	0.01	YES
	694.855	494.185	456.7	286.235	NA		28	18	17	4		α	0.05		α*	0.005					EM:EC	9.875	5.00446	1.97324	1.78283	0.0484683	0.025	NO
	591.58	603.035	550.58	440.485	NA		24	25	20	14		Sig.	YES								ST:AM	17.25	7.64444	2.25654	2.72332	0.0240368	0.015	NO
	755.28	636.18	412.93	NA	NA		29	26	12												ST:AC	11.5	7.64444	1.50436	2.72332	0.132488	0.03	NO
						R-sum	210	164	127	42	18										ST:EM	6.875	7.64444	0.899346	2.72332	0.368468	0.045	NO
						R^2/n	5512.5	3362	2016.12	252	162										ST:EC	3	7.75288	0.386953	2.76195	0.698791	0.05	NO
Citalopram	AM	AC	EM	EC	Start	Kruskal-Walis	AM	AC	EM	EC	Start				Dunn's	AM	AC	EM	EC	Start	Groups	diff. R-mean	std err	z-stat	R-crit	p-value	BH P value	Sig.
	3.35	22.035	42.445	66.045	196.345	Ranks	5	16	22	26	33	n	33		R-sum	37	99	166	194	65	AM:AC	7.75	4.83477	1.60297	1.72238	0.108941	0.035	NO
	5.035	16.255	47.055	71.655	130.143		9	12	25	27	32	Sum R^2/n	12329.8		n	8	8	8	7	2	AM:EM	16.125	4.83477	3.33522	1.72238	0.000852333	0.015	YES
	2.66	17.075	34.875	78.38	NA		2	13	19	28		H	29.8697		R-mean	4.625	12.375	20.75	27.7143	32.5	AM:EC	23.0893	5.00446	4.61374	1.78283	3.95488e-06	0.005	YES
	2.715	4.9	40.895	90.21	NA		3	8	20	30		df	5		z-crit	2.80703					AC:EM	8.375	4.83477	1.73224	1.72238	0.0832302	0.03	NO
	4.36	8.69	31.53	84.21	NA		7	10	18	29		p	1.56452e-05		n-total	33					AC:EC	15.3393	5.00446	3.06512	1.78283	0.00217581	0.02	YES
	2	14.975	44.885	42.71	NA		1	11	24	23		α	0.05		α*	0.005					EM:EC	6.96429	5.00446	1.39162	1.78283	0.164039	0.045	NO
	3.405	20.475	41.82	91.595	NA		6	14	21	31		Sig.	YES								ST:AM	27.875	7.64444	3.64644	2.72332	0.000265899	0.01	YES
	3.215	21.045	31.43	NA	NA		4	15	17												ST:AC	20.125	7.64444	2.63263	2.72332	0.00847262	0.025	YES
						R-sum	37	99	166	194	65										ST:EM	11.75	7.64444	1.53706	2.72332	0.124278	0.04	NO
						R^2/n	171.125	1225.12	3444.5	5376.57	2112.5										ST:EC	4.78571	7.75288	0.617282	2.76195	0.537049	0.05	NO
Fluvoxamine	AM	AC	EM	EC	Start	Kruskal-Walis	AM	AC	EM	EC	Start				Dunn's	AM	AC	EM	EC	Start	Groups	diff. R-mean	std err	z-stat	R-crit	p-value	BH P value	Sig.
	92.48	0	69.54	68.18	51.6175	Ranks	31	2	15	13	5	n	33		R-sum	194	69	193	96	9	AM:AC	15.625	4.83123	3.23416	1.72112	0.00121999	0.005	YES
	90	73.55	87.54	72.61	38.46		29	17	26	16	4	Sum R^2/n	11312.8		n	8	8	8	7	2	AM:EM	0.125	4.83315	0.025863	1.7218	0.979367	0.05	NO
	106.68	79.1	90.96	61.195	NA		33	20	30	7		H	18.9927		R-mean	24.25	8.625	24.125	13.7143	4.5	AM:EC	10.5357	5.00279	2.10597	1.78223	0.0352071	0.025	NO
	62.385	0	81.87	64.895	NA		8	2	22	10		df	5		z-crit	2.80703					AC:EM	15.5	4.83315	3.20702	1.7218	0.0013412	0.01	YES
	87.64	65.695	79.265	68.915	NA		27	11	21	14		p	0.00192813		n-total	33					AC:EC	5.08929	5.00279	1.01729	1.78223	0.309016	0.04	NO
	85.595	0	77.115	66.005	NA		23	2	19	12		α	0.05		α*	0.005					EM:EC	10.4107	5.00279	2.08098	1.78223	0.0374356	0.03	NO
	73.85	63.69	94.105	85.66	NA		18	9	32	24		Sig.	YES								ST:AM	19.75	7.64189	2.58444	2.72241	0.00975372	0.015	YES
	85.93	60.485	88.31	NA	NA		25	6	28												ST:AC	4.125	7.64189	0.539788	2.72241	0.589343	0.045	NO
						R-sum	194	69	193	96	9										ST:EM	19.625	7.64189	2.56808	2.72241	0.0102263	0.02	YES
						R^2/n	4704.5	595.125	4656.12	1316.57	40.5										ST:EC	9.21429	7.75029	1.1889	2.76102	0.234481	0.035	NO
Gabapentin	AM	AC	EM	EC	Start	Kruskal-Walis	AM	AC	EM	EC	Start				Dunn's	AM	AC	EM	EC	Start	Groups	diff. R-mean	std err	z-stat	R-crit	p-value	BH P value	Sig.
	1514.97	1910.56	705.83	196.645	720.405	Ranks	27	33	11	3	13	n	33		R-sum	190	205	111	28	27	AM:AC	1.875	4.83477	0.387816	1.72238	0.698152	0.045	NO
	1532.35	1676.02	824.155	196.805	731.782		28	31	17	4	14	Sum R^2/n	11782.2		n	8	8	8	7	2	AM:EM	9.875	4.83477	2.0425	1.72238	0.0411023	0.02	NO
	1636.85	1423.68	708.755	229.275	NA		30	24	12	7		H	24.0134		R-mean	23.75	25.625	13.875	4	13.5	AM:EC	19.75	5.00446	3.94648	1.78283	7.93092e-05	0.01	YES
	791.415	634.99	698.8	147.415	NA		16	8	10	2		df	5		z-crit	2.80703					AC:EM	11.75	4.83477	2.43031	1.72238	0.0150858	0.015	NO
	1435.37	1311.65	997.665	218.2	NA		25	22	19	6		p	0.000215832		n-total	33					AC:EC	21.625	5.00446	4.32114	1.78283	1.55223e-05	0.005	YES
	1209.98	1501.59	790.475	209.67	NA		21	26	15	5		α	0.05		α*	0.005					EM:EC	9.875	5.00446	1.97324	1.78283	0.0484683	0.025	NO
	1187.34	1851.92	924.64	0	NA		20	32	18	1		Sig.	YES								ST:AM	10.25	7.64444	1.34084	2.72332	0.179971	0.035	NO
	1404.31	1559.37	694.13	NA	NA		23	29	9												ST:AC	12.125	7.64444	1.58612	2.72332	0.112712	0.03	NO
						R-sum	190	205	111	28	27										ST:EM	0.375	7.64444	0.0490552	2.72332	0.960875	0.05	NO
						R^2/n	4512.5	5253.12	1540.12	112	364.5										ST:EC	9.5	7.75288	1.22535	2.76195	0.220443	0.04	NO
Lamotrigine	AM	AC	EM	EC	Start	Kruskal-Walis	AM	AC	EM	EC	Start				Dunn's	AM	AC	EM	EC	Start	Groups	diff. R-mean	std err	z-stat	R-crit	p-value	BH P value	Sig.
	241.045	113.92	493.145	424.95	412.885	Ranks	13	8	27	24	22	n	33		R-sum	100	36	232	151	42	AM:AC	8	4.83477	1.65468	1.72238	0.0979893	0.03	NO
	199.635	73.415	625.025	417.71	341.203		11	2	33	23	20	Sum R^2/n	12279.3		n	8	8	8	7	2	AM:EM	16.5	4.83477	3.41278	1.72238	0.000643041	0.01	YES
	291.445	78.005	513.475	295.89	NA		16	3	28	17		H	29.3293		R-mean	12.5	4.5	29	21.5714	21	AM:EC	9.07143	5.00446	1.81267	1.78283	0.069883	0.025	NO
	143.705	59.385	457.475	333.575	NA		9	1	26	19		df	5		z-crit	2.80703					AC:EM	24.5	4.83477	5.06746	1.72238	4.03161e-07	0.005	YES
	248.545	100.01	528.49	401.27	NA		14	7	30	21		p	1.99814e-05		n-total	33					AC:EC	17.0714	5.00446	3.41124	1.78283	0.000646678	0.015	YES
	192.345	88.335	542.11	331.76	NA		10	4	31	18		α	0.05		α*	0.005					EM:EC	7.42857	5.00446	1.48439	1.78283	0.137706	0.035	NO
	240.525	94.64	565.285	516.575	NA		12	5	32	29		Sig.	YES								ST:AM	8.5	7.64444	1.11192	2.72332	0.266173	0.04	NO
	257.655	98.75	437.525	NA	NA		15	6	25												ST:AC	16.5	7.64444	2.15843	2.72332	0.0308944	0.02	NO
						R-sum	100	36	232	151	42										ST:EM	8	7.64444	1.04651	2.72332	0.295325	0.045	NO
						R^2/n	1250	162	6728	3257.29	882										ST:EC	0.571429	7.75288	0.0737053	2.76195	0.941245	0.05	NO
Lidocaine	AM	AC	EM	EC	Start	Kruskal-Walis	AM	AC	EM	EC	Start				Dunn's	AM	AC	EM	EC	Start	Groups	diff. R-mean	std err	z-stat	R-crit	p-value	BH P value	Sig.
	97.015	108.305	86.705	101.08	115.37	Ranks	24	31	9	29	33	n	33		R-sum	113	139	147	99	63	AM:AC	3.25	4.83477	0.672214	1.72238	0.501447	0.035	NO
	88.805	86.25	108.775	87.525	103.94		12	8	32	10	30	Sum R^2/n	10097		n	8	8	8	7	2	AM:EM	4.25	4.83477	0.879049	1.72238	0.379375	0.025	NO
	98.935	91.725	89.69	72.015	NA		26	20	14	3		H	5.9895		R-mean	14.125	17.375	18.375	14.1429	31.5	AM:EC	0.0178571	5.00446	0.00356824	1.78283	0.997153	0.05	NO
	63.03	71.68	90.35	84	NA		1	2	15	7		df	5		z-crit	2.80703					AC:EM	1	4.83477	0.206835	1.72238	0.836139	0.045	NO
	94.35	93.705	88.385	90.745	NA		22	21	11	18		p	0.307242		n-total	33					AC:EC	3.23214	5.00446	0.645852	1.78283	0.518375	0.04	NO
	82.07	91.455	95.58	79.435	NA		6	19	23	4		α	0.05		α*	0.005					EM:EC	4.23214	5.00446	0.845674	1.78283	0.397735	0.03	NO
	81.685	97.96	99.885	100	NA		5	25	27	28		Sig.	NO								ST:AM	17.375	7.64444	2.27289	2.72332	0.0230326	0.005	NO
	90.565	89.435	90.365	NA	NA		17	13	16												ST:AC	14.125	7.64444	1.84775	2.72332	0.0646389	0.015	NO
						R-sum	113	139	147	99	63										ST:EM	13.125	7.64444	1.71693	2.72332	0.0859913	0.02	NO
						R^2/n	1596.12	2415.12	2701.12	1400.14	1984.5										ST:EC	17.3571	7.75288	2.2388	2.76195	0.025169	0.01	NO
Pregabalin	AM	AC	EM	EC	Start	Kruskal-Walis	AM	AC	EM	EC	Start				Dunn's	AM	AC	EM	EC	Start	Groups	diff. R-mean	std err	z-stat	R-crit	p-value	BH P value	Sig.
	159.665	220.265	80.76	25.085	48.425	Ranks	26	33	14	4	7	n	33		R-sum	190	204	116	36	15	AM:AC	1.75	4.83477	0.361961	1.72238	0.717381	0.045	NO
	174.545	161.665	83.145	23.065	56.5225		29	27	16	3	8	Sum R^2/n	11694.1		n	8	8	8	7	2	AM:EM	9.25	4.83477	1.91322	1.72238	0.0557193	0.03	NO
	192.4	159.5	92.39	34.215	NA		30	25	19	6		H	23.071		R-mean	23.75	25.5	14.5	5.14286	7.5	AM:EC	18.6071	5.00446	3.71811	1.78283	0.000200719	0.01	YES
	75.45	65.845	60.15	15.9	NA		12	11	9	1		df	5		z-crit	2.80703					AC:EM	11	4.83477	2.27519	1.72238	0.0228948	0.02	NO
	163.795	135.62	85.065	27.04	NA		28	22	17	5		p	0.000327171		n-total	33					AC:EC	20.3571	5.00446	4.0678	1.78283	4.74594e-05	0.005	YES
	118.885	138.155	92.135	17.935	NA		21	23	18	2		α	0.05		α*	0.005					EM:EC	9.35714	5.00446	1.86976	1.78283	0.0615172	0.035	NO
	115.6	209.64	79.625	81.805	NA		20	32	13	15		Sig.	YES								ST:AM	16.25	7.64444	2.12573	2.72332	0.033526	0.025	NO
	145.955	199.57	60.93	NA	NA		24	31	10												ST:AC	18	7.64444	2.35465	2.72332	0.0185401	0.015	NO
						R-sum	190	204	116	36	15										ST:EM	7	7.64444	0.915698	2.72332	0.359825	0.04	NO
						R^2/n	4512.5	5202	1682	185.143	112.5										ST:EC	2.35714	7.75288	0.304034	2.76195	0.761102	0.05	NO
Quetiapine	AM	AC	EM	EC	Start	Kruskal-Walis	AM	AC	EM	EC	Start				Dunn's	AM	AC	EM	EC	Start	Groups	diff. R-mean	std err	z-stat	R-crit	p-value	BH P value	Sig.
	4.065	5.245	5.98	4.19	101.97	Ranks	9.5	18	24	11	33	n	33		R-sum	80.5	181.5	124	110	65	AM:AC	12.625	4.82252	2.61792	1.71801	0.00884663	0.01	YES
	3.94	7.415	6.175	4.89	17.2725		8	30	25	16	32	Sum R^2/n	10690.9		n	8	8	8	7	2	AM:EM	5.4375	4.83032	1.1257	1.72079	0.260292	0.045	NO
	5.085	0	4.52	4.415	NA		17	2.5	13	12		H	12.341		R-mean	10.0625	22.6875	15.5	15.7143	32.5	AM:EC	5.65179	4.99986	1.13039	1.78119	0.258312	0.04	NO
	0	5.65	0	4.74	NA		2.5	22	2.5	15		df	5		z-crit	2.80703					AC:EM	7.1875	4.83032	1.488	1.72079	0.136752	0.025	NO
	3.74	5.945	5.275	7.37	NA		7	23	19	29		p	0.0304025		n-total	33					AC:EC	6.97321	4.99986	1.39468	1.78119	0.163112	0.03	NO
	4.62	6.715	3.6	5.395	NA		14	27	5	21		α	0.05		α*	0.005					EM:EC	0.214286	4.99986	0.0428583	1.78119	0.965814	0.05	NO
	5.285	7.68	6.62	3.685	NA		20	31	26	6		Sig.	YES								ST:AM	22.4375	7.63741	2.93784	2.72081	0.00330507	0.005	YES
	0	6.805	4.065	NA	NA		2.5	28	9.5												ST:AC	9.8125	7.63741	1.28479	2.72081	0.198864	0.035	NO
						R-sum	80.5	181.5	124	110	65										ST:EM	17	7.63741	2.22588	2.72081	0.0260219	0.015	NO
						R^2/n	810.031	4117.78	1922	1728.57	2112.5										ST:EC	16.7857	7.74575	2.16709	2.75941	0.0302282	0.02	NO
Tramadol	AM	AC	EM	EC	Start	Kruskal-Walis	AM	AC	EM	EC	Start				Dunn's	AM	AC	EM	EC	Start	Groups	diff. R-mean	std err	z-stat	R-crit	p-value	BH P value	Sig.
	283.475	341.065	281.48	354.845	565.817	Ranks	17	27	16	28	33	n	33		R-sum	73	103	193	128	64	AM:AC	3.75	4.83477	0.775632	1.72238	0.437967	0.05	NO
	234.39	260.105	390.195	299.095	392.97		6	10	30	19	31	Sum R^2/n	11036.9		n	8	8	8	7	2	AM:EM	15	4.83477	3.10253	1.72238	0.00191877	0.005	YES
	290.695	275.81	307.885	208.485	NA		18	13	22	3		H	16.0422		R-mean	9.125	12.875	24.125	18.2857	32	AM:EC	9.16071	5.00446	1.83051	1.78283	0.0671738	0.025	NO
	123.225	159.455	305.655	276.07	NA		1	2	21	14		df	5		z-crit	2.80703					AC:EM	11.25	4.83477	2.32689	1.72238	0.0199709	0.02	YES
	279.52	243.245	319.635	317.465	NA		15	8	24	23		p	0.0067246		n-total	33					AC:EC	5.41071	5.00446	1.08118	1.78283	0.279618	0.04	NO
	211.12	264.245	324.865	250.83	NA		4	11	25	9		α	0.05		α*	0.005					EM:EC	5.83929	5.00446	1.16682	1.78283	0.243285	0.035	NO
	213.595	305	367.045	396.445	NA		5	20	29	32		Sig.	YES								ST:AM	22.875	7.64444	2.99237	2.72332	0.00276821	0.01	YES
	238.335	273.795	326.2	NA	NA		7	12	26												ST:AC	19.125	7.64444	2.50182	2.72332	0.0123558	0.015	YES
						R-sum	73	103	193	128	64										ST:EM	7.875	7.64444	1.03016	2.72332	0.302935	0.045	NO
						R^2/n	666.125	1326.12	4656.12	2340.57	2048										ST:EC	13.7143	7.75288	1.76893	2.76195	0.0769059	0.03	NO
Venlafaxine	AM	AC	EM	EC	Start	Kruskal-Walis	AM	AC	EM	EC	Start				Dunn's	AM	AC	EM	EC	Start	Groups	diff. R-mean	std err	z-stat	R-crit	p-value	BH P value	Sig.
	113.32	0	131.985	159.975	283.918	Ranks	14	1.5	20	29	33	n	33		R-sum	68.5	74.5	199	155	64	AM:AC	0.75	4.88621	0.153493	1.7407	0.878009	0.05	NO
	99.135	90.465	162.835	134.645	179.472		8	6	30	22	31	Sum R^2/n	11710.6		n	8	8	8	7	2	AM:EM	16.3125	4.83437	3.37428	1.72223	0.000740093	0.005	YES
	115.59	106.595	137.805	102.035	NA		16	12	24	10		H	23.2468		R-mean	8.5625	9.3125	24.875	22.1429	32	AM:EC	13.5804	5.00404	2.71388	1.78268	0.0066501	0.025	YES
	0	77.685	154.255	131.11	NA		1.5	3	27	19		df	5		z-crit	2.80703					AC:EM	15.5625	4.83437	3.21914	1.72223	0.00128576	0.01	YES
	104.085	97.295	135.005	149.645	NA		11	7	23	25		p	0.000302787		n-total	33					AC:EC	12.8304	5.00404	2.564	1.78268	0.0103474	0.03	YES
	80.445	109.3	154.255	124.635	NA		4	13	26	18		α	0.05		α*	0.005					EM:EC	2.73214	5.00404	0.545987	1.78268	0.585075	0.045	NO
	81.94	117.145	154.595	186.075	NA		5	17	28	32		Sig.	YES								ST:AM	23.4375	7.6438	3.06621	2.72309	0.00216792	0.015	YES
	100.255	113.97	133.83	NA	NA		9	15	21												ST:AC	22.6875	7.6438	2.96809	2.72309	0.00299656	0.02	YES
						R-sum	68.5	74.5	199	155	64										ST:EM	7.125	7.6438	0.932128	2.72309	0.351271	0.04	NO
						R^2/n	586.531	693.781	4950.12	3432.14	2048										ST:EC	9.85714	7.75223	1.27152	2.76172	0.203543	0.035	NO
Ibuprofen	AM	AC	EM	EC	Start	Kruskal-Walis	AM	AC	EM	EC	Start				Dunn's	AM	AC	EM	EC	Start	Groups	diff. R-mean	std err	z-stat	R-crit	p-value	BH P value	Sig.
	2512.34	1719.91	2473.85	2129.34	1431.25	Ranks	28	8	26	14	2	n	33		R-sum	140	163	111	139	8	AM:AC	2.875	4.83477	0.594651	1.72238	0.552077	0.04	NO
	2642.01	2217.56	2465.5	1672.05	1616.2		31	18	25	7	6	Sum R^2/n	10103.4		n	8	8	8	7	2	AM:EM	3.625	4.83477	0.749777	1.72238	0.453389	0.035	NO
	2360.03	3213.44	1500.19	2342.26	NA		23	33	4	22		H	6.05768		R-mean	17.5	20.375	13.875	19.8571	4	AM:EC	2.35714	5.00446	0.471008	1.78283	0.637635	0.045	NO
	1279.03	2601.44	2274.17	2289.69	NA		1	30	20	21		df	5		z-crit	2.80703					AC:EM	6.5	4.83477	1.34443	1.72238	0.17881	0.02	NO
	2200.53	2676.55	1730.03	2557.6	NA		16	32	9	29		p	0.300647		n-total	33					AC:EC	0.517857	5.00446	0.103479	1.78283	0.917583	0.05	NO
	2014.03	1478.09	1584.15	2258.64	NA		13	3	5	19		α	0.05		α*	0.005					EM:EC	5.98214	5.00446	1.19536	1.78283	0.231946	0.03	NO
	1906.22	2410.01	1997.6	2486.43	NA		11	24	12	27		Sig.	NO								ST:AM	13.5	7.64444	1.76599	2.72332	0.0773977	0.015	NO
	2214.98	2147.82	1795.38	NA	NA		17	15	10												ST:AC	16.375	7.64444	2.14208	2.72332	0.0321871	0.005	NO
						R-sum	140	163	111	139	8										ST:EM	9.875	7.64444	1.29179	2.72332	0.196431	0.025	NO
						R^2/n	2450	3321.12	1540.12	2760.14	32										ST:EC	15.8571	7.75288	2.04532	2.76195	0.040823	0.01	NO

## Sheet: S7 - Physicochemical Analysis
Table S7: Physicochemical properties for the 11 compounds with removal efficiencies. Biodegradation half-lives were predicted using Episuite’s BCFBAF module and the logged values are included for the correlations. pKa values where obtained from PubChem (both acidic and basic). Solubility data were calculated at a pH of 7 and 11 using Chemicalize. The change in log solubility and log half life wer…
Compound	Half-Life	Log Half Life	pKa (Acidic)	pKa (Basic)	LogS @pH 7	LogS @pH 11	LogS Change	Log Half-Life * ΔLogS	AC Removal	AM Removal
Carbamazepine	0.1499	-0.824198	15.96	-3.8	-3.79	-3.79	0	0	-0.789296	-1.32376
Citalopram	0.6913	-0.160333		9.38	0	-3.76	-3.76	0.602854	0.784285	0.954171
Fluvoxamine	4.423	0.645717		8.86	-1.18	-2.95	-1.77	-1.14292	-0.000582953	-0.247307
Gabapentin	0.05058	-1.29602	10.7	3.68	-1.12	-0.0074	1.1126	-1.44195	-5.98697	-5.72453
Lamotrigine	0.1397	-0.854804		5.7	-4.39	-4.43	-0.04	0.0341921	0.773687	0.410611
Pregabalin	0.02975	-1.52651	10.6	4.2	-1.24	-0.41	0.83	-1.26701	-4.69629	-4.48576
Tramadol	0.2277	-0.642637	13.08	9.23	-0.16	-2.54	-2.38	1.52948	0.0970928	0.187979
Venlafaxine	0.1507	-0.821887		9.5	-0.57	-2.58	-2.01	1.65199	0.255704	0.273529
Lidocaine	0.02237	-1.65033	8.01	7.86	-1.81	-2.64	-0.83	1.36978	-0.0496392	0.00166781
Quetiapine	0.03768	-1.42389		7.06	-3.44	-4.27	-0.83	1.18183	-0.349263	0.0457246
Ibuprofen	1.875	0.273001	5.2	4.45	-1.39	0	1.39	0.379472	-0.0446082	0.0221571
								Pearson Correlation Coefficients	AC	AM
								r	0.690056	0.734735
								n	11	11
								t	2.86031	3.24934
								p	0.0375415	0.0200158

## Sheet: S8 - Cultivation Data
Table S8: Additional measurements from the algae cultivation and control aquaria, including Disolved Oxygen, pH, Conductivity, and temperature
Day	Date	time	Hour	Treatment	DO	pH	Cond	temp
t0	2021-06-25	17:00:00	0	Control	4.9	6.58	352	19.9
t0	2021-06-25	17:00:00	0	Alg	5.1	6.72	449	20
t1	2021-06-26	13:00:00	20	Control	8.5	6.78	354	25.6
t1	2021-06-26	13:00:00	20	Alg	9	7.08	449	23.7
t2	2021-06-27	14:00:00	45	Control	7.99	8.1	353	27.8
t2	2021-06-27	14:00:00	45	Alg	9.36	8.25	442	23.8
t3	2021-06-28	12:30:00	69.5	Control	7.87	7.57	349	27.3
t3	2021-06-28	12:30:00	69.5	Alg	9.35	8.41	437	24.7
t4	2021-06-29	13:00:00	94	Control	8.21	6.64	347	24.5
t4	2021-06-29	13:00:00	94	Alg	10.65	9.09	428	24.8
t5	2021-06-30	13:00:00	118	Control	8.61	7.11	337	24.6
t5	2021-06-30	13:00:00	118	Alg	11.37	9.79	415	24.8
t6	2021-07-01	13:00:00	142	Control	8.71	6.61	342	24.4
t6	2021-07-01	13:00:00	142	Alg	11.8	10.56	457	24.7
t7	2021-07-02	11:00:00	164	Control	8.61	7.06	337	24.5
t7	2021-07-02	11:00:00	164	Alg	11.01	10.78	483	24.6
t8	2021-07-03	13:30:00	190.5	Control	7.28	8.68	336	24.2
t8	2021-07-03	13:30:00	190.5	Alg	11.3	11.04	557	24.7
t9	2021-07-04	13:00:00	214	Control	8.8	8.68	340	24.1
t9	2021-07-04	13:00:00	214	Alg	10.65	9.09	553	24.7
t10	2021-07-05	16:00:00	241	Control	8.77	7.69	344	24.6
t10	2021-07-05	16:00:00	214	Alg	11.02	11.02	550	25
t11	2021-07-06	10:30:00	230.5	Control	8.7	6.76	337	25.2
t11	2021-07-06	10:30:00	230.5	Alg	10.33	10.85	491	24.4

## Sheet: S9 - Ionisation Data
Table S8: Calculations of ionisation percentage for each compound according to the pH of the algae culture over the 11 days. Day 9 likely had an erronious measuremnt (see s8) and so an average of day 8 and 10 were used instead for this value.
Day	pH	Carbamazepine	Gabapentin	Pregabalin	Ibuprofen	Venlafaxine	Citalopram	Tramadol	Fluvoxamine	Lidocaine	Quetiapine	Lamotrigine
0	6.72	5.7544e-10	0.000104702	0.000131808	0.970686	0.998343	0.997817	0.996919	0.992808	0.951216	0.6863	0.0871742
1	7.08	1.31826e-09	0.000239826	0.000301904	0.986989	0.996213	0.995013	0.99297	0.983675	0.894863	0.488489	0.0400187
2	8.25	1.94984e-08	0.00353559	0.00444697	0.99911	0.94676	0.930985	0.905213	0.802909	0.365257	0.0606496	0.00281046
3	8.41	2.81838e-08	0.00510245	0.00641512	0.999384	0.924827	0.903218	0.868541	0.738109	0.284747	0.0427584	0.00194605
4	9.09	1.34896e-07	0.023959	0.0299766	0.999871	0.719919	0.660999	0.5799	0.370611	0.0767893	0.00924625	0.000407214
5	9.79	6.76083e-07	0.109549	0.13411	0.999974	0.339001	0.280081	0.215946	0.105137	0.0163249	0.00185863	8.12764e-05
6	10.56	3.98106e-06	0.4201	0.47699	0.999996	0.0801183	0.0619747	0.0446835	0.0195623	0.00281046	0.000316128	1.38037e-05
7	10.78	6.60689e-06	0.545922	0.602158	0.999997	0.0498639	0.0382865	0.0274113	0.0118798	0.00169536	0.00019051	8.31757e-06
8	11.04	1.20225e-05	0.6863	0.733634	0.999999	0.0280319	0.0214092	0.0152519	0.00656357	0.000932384	0.000104702	4.57086e-06
9	11.03	1.17488e-05	0.681322	0.72911	0.999999	0.0286661	0.021897	0.0156017	0.00671543	0.000954081	0.00010714	4.67733e-06
10	11.02	1.14814e-05	0.676302	0.724538	0.999998	0.0293142	0.0223956	0.0159593	0.00687078	0.000976283	0.000109636	4.78628e-06
11	10.85	7.76241e-06	0.585499	0.640065	0.999998	0.0427584	0.0327739	0.0234264	0.0101293	0.00144335	0.000162155	7.07941e-06
